# Supplementary material
Source: MDPI journal article supplement (https://www.mdpi.com/2076-3417/11/22/10797)
Supplement: s1 [file s1]

Supporting Information for

# In-situ generation of hydrogen peroxide from formic acid and air using polymetallic Co-doped g-C<sub>3</sub>N<sub>4</sub> for pollutant removal

Liyan Wang <sup>1,2</sup>, Jianqing Ma <sup>1,3,\*</sup>, Qianhui Guo <sup>1</sup>, Liang Liu <sup>4</sup>, Jiangnan Shou <sup>1</sup>, Aojie Sun <sup>1</sup> and Liaoyuan Zhao <sup>4</sup>

<sup>1</sup> School of Civil Engineering and Architecture, NingboTech University, Ningbo 315100, China; cpgzwly@163.com (L.W.); guoqh@nbt.edu.cn (Q.G.); shoujn@nbt.edu.cn (J.S.); 3190621168@nbt.edu.cn (A.S.)

<sup>2</sup> Polytechnic Institute of Technology, Zhejiang University, Hangzhou 310015, China

<sup>3</sup> Ningbo Research Institute, Zhejiang University, Ningbo 315100, China

<sup>4</sup> Blue City Ecological Co., Ltd, Ningbo 315100, China; liuliang@bluecityeco.com (L.L.); zhaoly@bluecityeco.com (L.Z.)

\* Correspondence: majq@nit.zju.edu.cn; Tel./Fax: +86 18367463842

Summary of Content: 8 pages including 6 figures and 1 table.

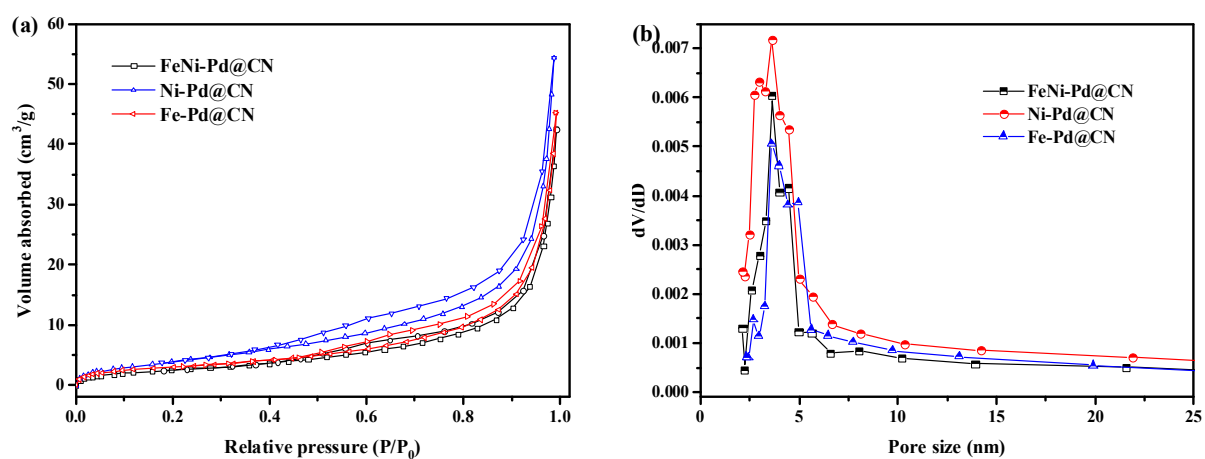

**Figure S1.** (a) Nitrogen adsorption-desorption isotherms and (b) Pore size distribution curves of the FeNi-Pd@CN, Ni-Pd@CN and Fe-Pd@CN.

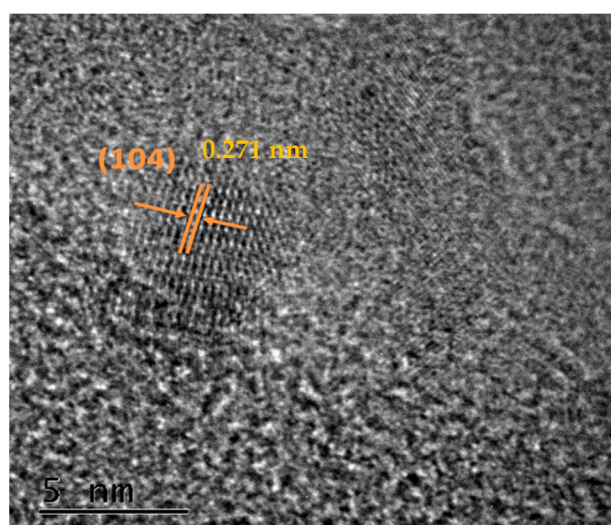

**Figure S2.**  $\alpha$ -Fe<sub>2</sub>O<sub>3</sub> (104) facet in the HRTEM image of FeNi-Pd@CN.

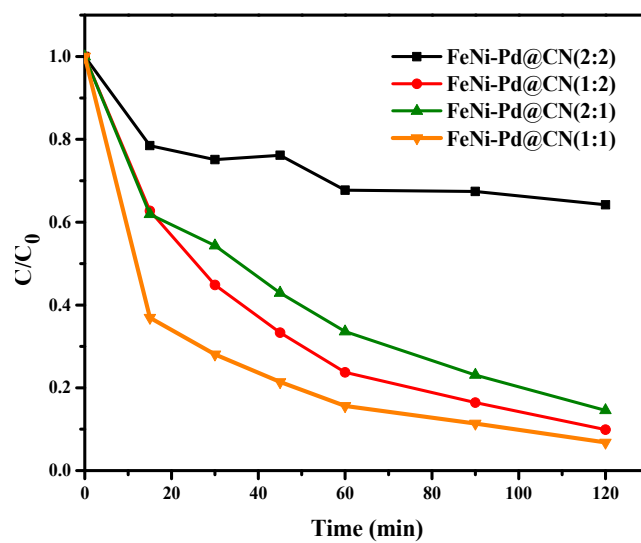

**Figure S3.** Degradation of TC by different catalysts (TC 10 mg/L; catalyst dosage: 2 g/L; FA: 46.6 mmol/L; air; 200 mL/min).

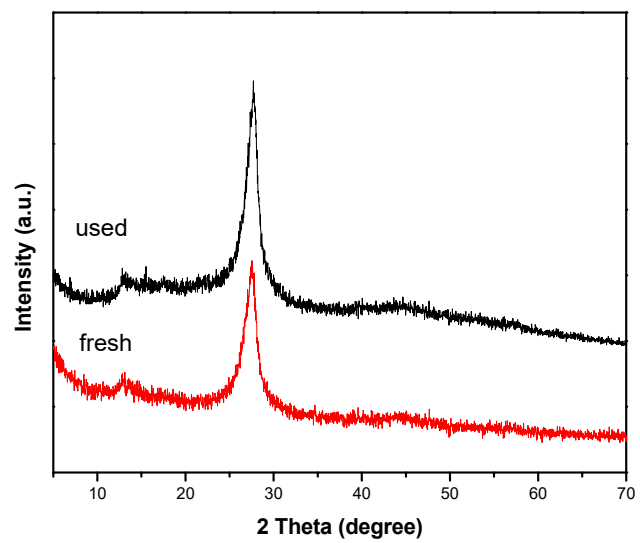

**Figure S4.** XRD of fresh catalyst and after the fourth reused catalyst.

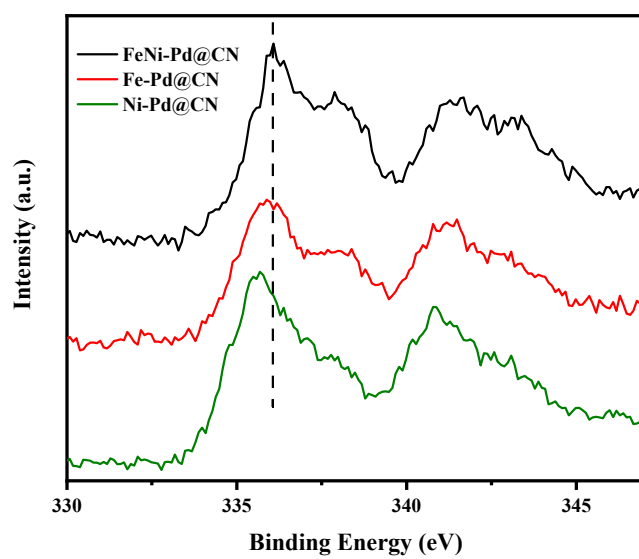

**Figure S5.** The comparison of Pd 3d XPS spectra of different samples.

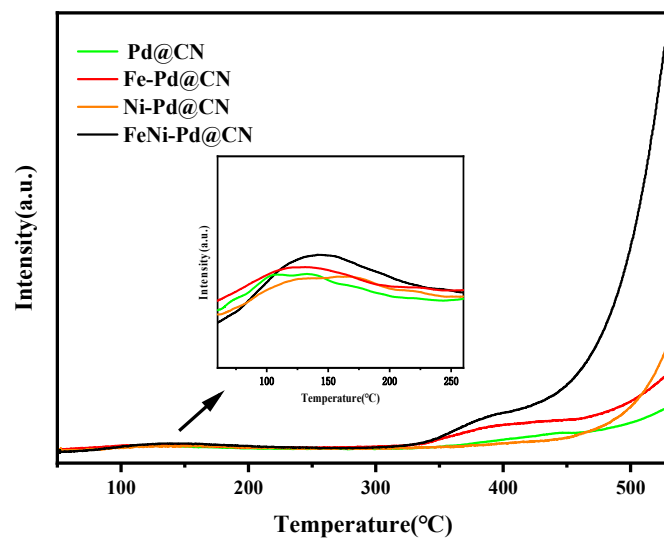

**Figure S6.** O<sub>2</sub>-TPD curves of different catalysts.

**Table S1** Elements contents of FeNi-Pd@CN calculated from the EDS results

| Element  | C     | N     | O    | Fe   | Ni   | Pd   |
|----------|-------|-------|------|------|------|------|
| Weight % | 51.69 | 34.97 | 6.19 | 2.98 | 3.90 | 0.27 |
| Atomic % | 58.88 | 34.16 | 5.30 | 0.72 | 0.91 | 0.03 |
